# Supplementary material
Source: PubMed Central journal article supplement (PMC5376963)
Supplement: EMBJ-36-949-s002.pdf [file EMBJ-36-949-s002.pdf]

| Mutation      | Primer                                             |
|---------------|----------------------------------------------------|
| FocA_T91V_fw  | GGA GCC GAT CTC TTT <b>GTT</b> TCC ACC GTG TTG ATT |
| FocA_T91S_fw  | GGA GCC GAT CTC TTT <b>TCT</b> TCC ACC GTG TTG ATT |
| FocA_T91X_rv  | AAA GAG ATC GGC TCC GCA GAC AAC ACA AAG            |
| FocA_K156C_fw | CAA ACC GCC GAC CAC <b>TGC</b> GTG CAC CAT ACT TTT |
| FocA_K156A_fw | CAA ACC GCC GAC CAC <b>GCA</b> GTG CAC CAT ACT TTT |
| FocA_K156M_fw | CAA ACC GCC GAC CAC <b>ATG</b> GTG CAC CAT ACT TTT |
| FocA_K156X_rv | GTG GTC GGC GGT TGT TAG GAC GTT TAG TCC            |
| FocA_E208Q_fw | GTT GCC AGC GGT TTT <b>CAG</b> CAC AGT ATC GCA AAC |
| FocA_E208L_fw | GTT GCC AGC GGT TTT <b>CTG</b> CAC AGT ATC GCA AAC |
| FocA_E208X_rv | AAA ACC GCT GGC AAC AAA CAT CGC GAC CGG            |
| FocA_H209N_fw | GCC AGC GGT TTT GAG <b>AAC</b> AGT ATC GCA AAC ATG |
| FocA_H209X_rv | CTC AAA ACC GCT GGC AAC AAA CAT CGC GAC            |

Primer sequences for site-directed mutagenesis of FocA; the mutating codon is highlighted.
